# Annals of Oncology

Official Journal of the  
European Society for Medical Oncology

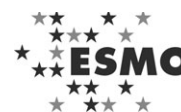

## Volume 18, 2007 Supplement 3

A global comparison regarding patient access to cancer drugs

|                                                                  |       |                                                                    |       |
|------------------------------------------------------------------|-------|--------------------------------------------------------------------|-------|
| Preface                                                          | iii1  | Market access for cancer drugs and the role of health economics    | iii55 |
| Summary                                                          | iii2  | The effect of cancer drug vintage on cancer survival and mortality | iii67 |
| The burden and cost of cancer                                    | iii8  | Acknowledgements                                                   | iii78 |
| Medical review                                                   | iii23 |                                                                    |       |
| Market uptake of new oncology drugs                              | iii31 |                                                                    |       |
| Cancer research and development and the drug development process | iii49 |                                                                    |       |
